# Supplementary material for: Photocatalytic conversion of lignocellulosic biomass to valuable products
Source: Royal Society of Chemistry journal article supplement (doi:10.1039/c9gc01728c), 2019-01-01
Supplement: c9gc01728c1.pdf [file c9gc01728c1.pdf]

## **Supporting Information**

### **Photocatalytic conversion of lignocellulosic biomass to valuable products**

Xiaoqing Liu<sup>1</sup>, Xiaoguang Duan<sup>2</sup>, Wei Wei<sup>1</sup>, Shaobin Wang<sup>2</sup>, Bing-Jie Ni<sup>1,\*</sup>

<sup>1</sup>Centre for Technology in Water and Wastewater, School of Civil and Environmental Engineering, University of Technology Sydney, Sydney, NSW 2007, Australia

<sup>2</sup>School of Chemical Engineering, The University of Adelaide, Adelaide, South Australia 5005, Australia

**\*Corresponding author:**

Tel.: +61 295147401; E-mail: bingjieni@gmail.com

**Table S1** The main products of lignin photocatalysis and their applications

| Products       | Applications                                                                                              | Market demand |
|----------------|-----------------------------------------------------------------------------------------------------------|---------------|
| Guaiacol       | Precursor to flavours                                                                                     | High          |
| Vanillin       | Food flavouring, fragrance, pharmaceutical, cosmetics industries                                          | High          |
| Succinic acid  | Precursor to polymers, resins and solvents                                                                | High          |
| Malonic acid   | Precursor of polyesters, used in electronic, flavours and fragrances, and pharmaceutical industries       | High          |
| Syringaldehyde | Pharmaceuticals, food, cosmetics, textiles, pulp and paper industries and biological control applications | High          |
| Pyrocatechol   | Precursor of pesticides, flavours and fragrances                                                          | High          |
| Styrene        | Precursor of latex, synthetic rubber, and polystyrene resins                                              | High          |
| Ethyl Benzene  | Gasoline anti-knock agent                                                                                 | Medium        |

**Table S2** The hydrolysis of cellulose on Ir/Amberlyst-15 and Ir/HY<sub>3</sub> catalysts. Reprinted with permission from ref. 1.

| Catalyst           | Temperature (°C) | Light | Time (h) | Cellobiose (%) | Glucose (%) | 5-HMF (%) | Total (%) |
|--------------------|------------------|-------|----------|----------------|-------------|-----------|-----------|
| Ir/Amberlyst-15    | 70               | +     | 72       | 11.9           | 43.2        | 17.5      | 72.6      |
| Ir/Amberlyst-15    | 70               | -     | 72       | 8.9            | 8.2         | 1.0       | 18.1      |
| Ir/Amberlyst-15    | 90               | +     | 9        | 13.7           | 54.1        | 5.4       | 73.2      |
| Ir/Amberlyst-15    | 90               | -     | 9        | 10.6           | 13.0        | 1.9       | 25.5      |
| Ir/HY <sub>3</sub> | 90               | +     | 13       | 10.9           | 40.4        | 24.0      | 75.3      |
| Ir/HY <sub>3</sub> | 90               | -     | 13       | 7.0            | 0.3         | 1.1       | 8.4       |

## References

1. Zhang, B., et al., Photothermally promoted cleavage of  $\beta$ -1,4-glycosidic bonds of cellulosic biomass on Ir/HY catalyst under mild conditions. *Appl. Catal., B*, 2018. **237**, 660-664.
